# Supplementary material for: A comparison between acute large vessel occlusion in the posterior circulation and anterior circulation after endovascular treatment: the ANGEL-ACT registry experience
Source: HighWire-hosted journal article supplement (doi:10.1136/svn-2021-001093), 2022-03-08

**Supplementary Figure 7 Outcome of the modified Rankin Scale at 90-day between different occlusion sites in PCO group.**

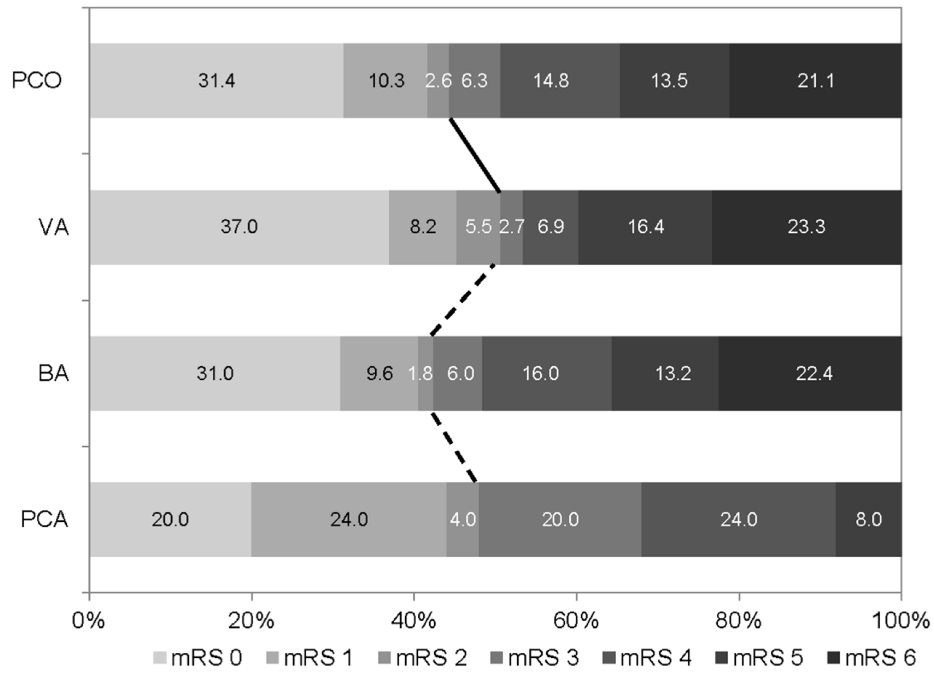

Supplement: svn-2021-001093supp002_data_supplement.pdf [file svn-2021-001093supp002_data_supplement.pdf]
