# Supplementary material for: A comparison between acute large vessel occlusion in the posterior circulation and anterior circulation after endovascular treatment: the ANGEL-ACT registry experience
Source: HighWire-hosted journal article supplement (doi:10.1136/svn-2021-001093), 2022-03-08
Supplement: svn-2021-001093supp003_data_supplement.pdf [file svn-2021-001093supp003_data_supplement.pdf]

**Supplementary Table 4 Baseline Characteristic between different occlusion sites in PCO group.**

| Characteristic                     | VA<br>(n=76) | BA<br>(n=296) | PCA<br>(n=25) | p       |
|------------------------------------|--------------|---------------|---------------|---------|
| Age(y)                             | 60(52-67)    | 65(55-70)     | 66(54-73)     | 0.0788  |
| Male (n,%)                         | 67(88.16%)   | 221(74.66%)   | 13(52.00%)    | 0.0008  |
| Hypertension (n,%)                 | 58(76.32%)   | 200(67.57%)   | 14(56.00%)    | 0.1299  |
| Hypercholesterolemia (n,%)         | 17(22.37%)   | 30(10.14%)    | 3(12.00%)     | 0.0163  |
| Diabetes mellitus (n,%)            | 24(31.58%)   | 58(19.59%)    | 4(16.00%)     | 0.0601  |
| CAD (n,%)                          | 11(14.47%)   | 48(16.22%)    | 4(16.00%)     | 0.9334  |
| Current Smoker (n,%)               | 35(46.05%)   | 98(33.11%)    | 7 (28.00%)    | 0.0798  |
| Atrial Fibrillation (n,%)          | 5(6.58%)     | 65(21.96%)    | 8(32.00%)     | 0.0030  |
| History of stroke(n,%)             | 22(28.95%)   | 60(20.27%)    | 7(28.00%)     | 0.2127  |
| Admission NIHSS                    | 16(8-31)     | 23(13-35)     | 16(9-21)      | 0.0018  |
| pc-ASPECTS                         | 8 (7-10)     | 9 (7-10)      | 9 (8-10)      | 0.3542  |
| IV thrombolysis(n,%)               | 22(28.95%)   | 78(26.35%)    | 8(32.00%)     | 0.7727  |
| General anesthesia (n,%)           | 41(53.95%)   | 170(57.43%)   | 10(40.0%)     | 0.2609  |
| ASTIN/SIR 3-4 (n,%)                | 70 (92.11%)  | 278 (93.92%)  | 22 (88.00%)   | 0.4839  |
| Underlying ICAD (n,%) <sup>a</sup> | 53 (81.54%)  | 119 (47.04%)  | 3(13.64%)     | <0.0001 |
| Tandem occlusion (n,%)             | 17 (22.37%)  | 54 (18.24%)   | 3(12.00%)     | 0.4833  |
| Iib/IIIa inhibitor (n,%)           | 56(73.68%)   | 184(62.16%)   | 10(40.0%)     | 0.0087  |
| Extra angioplasty (n,%)            | 43(56.58%)   | 114 (38.51%)  | 3(12.00%)     | 0.0002  |
| Permanent stenting (n,%)           | 17 (22.37%)  | 27 (9.12%)    | 1 (4.00%)     | 0.0025  |
| Onset to puncture, min             | 310(195-440) | 300(210-445)  | 239(134-329)  | 0.0421  |
| Puncture to recanalization, min    | 96(58.5-139) | 93(59-143)    | 92(60-117)    | 0.6771  |
| Onset to recanalization, min       | 489(360-897) | 487(364-782)  | 397(275-487)  | 0.0066  |
| Number of Thrombectomy             | 1 (1-2)      | 1 (1-2)       | 1 (0-1)       | 0.0013  |

a=missing 57 data

VA, Vertebral artery; BA, Basilar artery; PCA, Posterior cerebral artery; CAD, Coronary Artery Disease; NIHSS, National Institute of Health Stroke Scale; pc-ASPECTS, posterior circulation Acute Stroke Prognosis Early Computed Tomography Score; IV, intravenous; ASTIN/SIR, American Society of Interventional and Therapeutic Neuroradiology/Society of Interventional Radiology Collateral Flow Grading System; ICAD, intracranial atherosclerotic disease;
