# Supplementary material for: A comparison between acute large vessel occlusion in the posterior circulation and anterior circulation after endovascular treatment: the ANGEL-ACT registry experience
Source: HighWire-hosted journal article supplement (doi:10.1136/svn-2021-001093), 2022-03-08
Supplement: svn-2021-001093supp004_data_supplement.pdf [file svn-2021-001093supp004_data_supplement.pdf]

**Supplementary Table 5 Safety and efficacy endpoint comparison between different occlusion sites in PCO group by multivariable logistic regression.**

| Parameter      | Recanalization       |         | Any ICH within 24h  |         | Symptomatic ICH within 24h |         |
|----------------|----------------------|---------|---------------------|---------|----------------------------|---------|
|                | Adjust OR (95%CI)    | p value | Adjust OR (95%CI)   | p value | Adjust OR (95%CI)          | p value |
| Occlusion site |                      |         |                     |         |                            |         |
| VA vs PCA      | 3.826 (1.201,12.190) | 0.0232  | 1.239 (0.410,3.745) | 0.7043  | 1.044 (0.086,12.658)       | 0.9728  |
| BA vs PCA      | 3.748 (1.442,9.741)  | 0.0067  | 1.585 (0.592,4.237) | 0.3597  | 1.068 (0.123,9.259)        | 0.9525  |
| Age            | 1.003 (0.976,1.031)  | 0.8260  | 1.011 (0.988,1.036) | 0.3532  | 1.051 (0.992,1.112)        | 0.0904  |
| Male           | 1.073 (0.514,2.241)  | 0.8512  | 0.976 (0.514,1.855) | 0.9412  | 0.790 (0.218,2.862)        | 0.7202  |
| NIHSS          | 1.010 (0.982,1.039)  | 0.4701  | 1.002 (0.979,1.026) | 0.8396  | 0.958 (0.908,1.011)        | 0.1215  |
| Parameter      | mRS 0-2 at 90d       |         | mRS 0-3 at 90d      |         | Mortality at 90d           |         |
|                | Adjust OR (95%CI)    | p value | Adjust OR (95%CI)   | p value | Adjust OR (95%CI)          | p value |
| Occlusion site |                      |         |                     |         |                            |         |
| VA vs PCA      | 0.777 (0.295,2.188)  | 0.6095  | 0.519 (0.219,1.394) | 0.2106  | NA                         | 0.9446  |
| BA vs PCA      | 0.921 (0.387,4.237)  | 0.8514  | 0.553 (0.236,2.584) | 0.2094  | NA                         | 0.9460  |
| Age            | 0.995 (0.977,1.014)  | 0.6295  | 1.002 (0.983,1.021) | 0.8395  | 0.997 (0.974,1.021)        | 0.8142  |
| Male           | 1.044 (0.615,1.771)  | 0.8744  | 1.407 (0.824,2.403) | 0.2104  | 0.639 (0.338,1.206)        | 0.1667  |
| NIHSS          | 0.947 (0.929,0.996)  | <0.0001 | 0.942 (0.924,0.961) | <0.0001 | 1.059 (1.033,1.086)        | <0.0001 |

VA, Vertebral artery; BA, Basilar artery; PCA, Posterior cerebral artery; ICH, intracranial hemorrhage; mRS, modified Rankin Scale; OR, odds ratio; NIHSS, National Institute of Health Stroke Scale.
